# Supplementary material
Source: PubMed Central journal article supplement (PMC6675544)
Supplement: jciinsight-4-129398-s167.pdf [file jciinsight-4-129398-s167.pdf]

## Appendix

Serine and one-carbon metabolism is required for HIF mediated protection against retinopathy of prematurity

Charandeep Singh<sup>1</sup>, George Hoppe<sup>1</sup>, Vincent Tran<sup>1</sup>, Leah McCollum<sup>1</sup>, Youstina Bolok<sup>1</sup>, Weilin Song<sup>1</sup>, Amit Sharma<sup>1</sup>, Henri Brunengraber<sup>2</sup>, and Jonathan E Sears<sup>1,3,\*</sup>

<sup>1</sup>Cole Eye Institute, Cleveland Clinic, 9500 Euclid Avenue, Cleveland Ohio 44195

<sup>2</sup>Department of Nutrition, Case Western Reserve University, Cleveland, OH 44109

<sup>3</sup>Cellular and Molecular Medicine, 9500 Euclid Avenue, Cleveland Ohio 44195

\*Corresponding Author: Sears JE, Cole Eye institute, Cleveland Clinic, 9500 Euclid Avenue, Cleveland Ohio 44195 Email: [searsj@ccf.org](mailto:searsj@ccf.org)

Supplementary tables -4

Supplementary figures-6

**Appendix Table S1** Systems levels analysis of pathways affected by Hyperoxia vs

Hyperoxia+Roxadustat of plasma metabolome in positive ionization mode of LC-MS/MS data.

| Pathway                                                     | Overlapping putative metabolites | p-values |
|-------------------------------------------------------------|----------------------------------|----------|
| 1,25-dihydroxyvitamin D3 biosynthesis/<br>Calcitriol        | 100.00%                          | 1.80E-03 |
| folate polyglutamylaton                                     | 100.00%                          | 4.70E-03 |
| glycine biosynthesis III                                    | 100.00%                          | 4.70E-03 |
| citrulline degradation                                      | 100.00%                          | 3.30E-02 |
| asparagine degradation I                                    | 100.00%                          | 3.30E-02 |
| Serine degradation II                                       | 100.00%                          | 3.30E-02 |
| L-serine degradation                                        | 100.00%                          | 3.30E-02 |
| N-acetylneuraminate and N-<br>acetylmannosamine degradation | 100.00%                          | 3.30E-02 |
| putrescine biosynthesis III                                 | 100.00%                          | 3.30E-02 |
| histamine biosynthesis                                      | 100.00%                          | 3.30E-02 |
| pyrimidine ribonucleotides interconversion                  | 100.00%                          | 3.30E-02 |
| glycine biosynthesis I                                      | 100.00%                          | 3.30E-02 |
| urea cycle                                                  | 85.70%                           | 1.20E-03 |
| glycine betaine degradation                                 | 85.70%                           | 1.20E-03 |
| 4-hydroxyproline degradation I                              | 83.30%                           | 1.70E-03 |
| citrulline-nitric oxide cycle                               | 83.30%                           | 1.70E-03 |
| arginine biosynthesis IV                                    | 80.00%                           | 1.10E-03 |
| asparagine biosynthesis I                                   | 80.00%                           | 3.40E-03 |
| citrulline biosynthesis                                     | 77.80%                           | 1.20E-03 |
| proline biosynthesis II (from arginine)                     | 75.00%                           | 1.60E-03 |
| alanine degradation III                                     | 75.00%                           | 1.20E-02 |
| glutamine degradation II                                    | 75.00%                           | 1.20E-02 |
| aspartate degradation II                                    | 75.00%                           | 1.20E-02 |
| glutathione biosynthesis                                    | 75.00%                           | 1.20E-02 |
| uridine-5-phosphate biosynthesis                            | 75.00%                           | 1.20E-02 |
| alanine biosynthesis II                                     | 75.00%                           | 1.20E-02 |
| aspartate biosynthesis                                      | 75.00%                           | 1.20E-02 |
| arginine degradation VI (arginase 2 pathway)                | 71.40%                           | 2.60E-03 |
| <i>tRNA charging pathway</i>                                | 70.00%                           | 9.70E-04 |
| histidine degradation III                                   | 66.70%                           | 6.70E-03 |
| putrescine degradation III                                  | 66.70%                           | 6.70E-03 |
| arginine degradation I (arginase pathway)                   | 66.70%                           | 6.70E-03 |
| phenylalanine degradation III                               | 62.50%                           | 4.40E-03 |

|                                                     |        |          |
|-----------------------------------------------------|--------|----------|
| β-alanine degradation I                             | 60.00% | 2.80E-02 |
| 4-aminobutyrate degradation IV                      | 60.00% | 2.80E-02 |
| glutathione-mediated detoxification                 | 60.00% | 2.80E-02 |
| glycine degradation (creatine biosynthesis)         | 60.00% | 2.80E-02 |
| folate transformations I                            | 60.00% | 2.80E-02 |
| folate transformations II (plants)                  | 60.00% | 2.80E-02 |
| salvage pathways of pyrimidine deoxyribonucleotides | 60.00% | 2.80E-02 |
| proline biosynthesis II                             | 60.00% | 2.80E-02 |
| creatine biosynthesis                               | 57.10% | 1.30E-02 |
| glutamate degradation IV                            | 50.00% | 2.60E-02 |
| lysine degradation II                               | 44.40% | 4.80E-02 |
| purine and pyrimidine metabolism                    | 41.70% | 4.20E-02 |

**Appendix Table S2** Systems levels analysis of pathways affected by Hyperoxia vs

Hyperoxia+Roxadustat of plasma metabolome in negative ionization mode of LC-MS/MS data.

| Pathway                                        | Overlapping putative metabolites | p-values |
|------------------------------------------------|----------------------------------|----------|
| histidine degradation III                      | 100.00%                          | 3.50E-03 |
| histamine degradation                          | 100.00%                          | 3.50E-03 |
| cysteine biosynthesis II                       | 100.00%                          | 4.10E-03 |
| cysteine biosynthesis/homocysteine degradation | 100.00%                          | 4.10E-03 |
| ketone oxidation                               | 100.00%                          | 1.20E-02 |
| L-arabinose degradation II                     | 100.00%                          | 1.20E-02 |
| ketolysis                                      | 100.00%                          | 1.20E-02 |
| citrulline degradation                         | 100.00%                          | 4.80E-02 |
| asparagine degradation I                       | 100.00%                          | 4.80E-02 |
| ketogenesis                                    | 100.00%                          | 4.80E-02 |
| aerobic respiration -- electron donor II       | 100.00%                          | 4.80E-02 |
| histamine biosynthesis                         | 100.00%                          | 4.80E-02 |
| ketogenesis                                    | 100.00%                          | 4.80E-02 |
| coenzyme A biosynthesis                        | 100.00%                          | 4.80E-02 |
| molybdenum cofactor (sulfide) biosynthesis     | 100.00%                          | 4.80E-02 |
| urea cycle                                     | 85.70%                           | 4.20E-03 |
| citrulline-nitric oxide cycle                  | 83.30%                           | 5.70E-03 |
| arginine biosynthesis IV                       | 80.00%                           | 3.60E-03 |
| asparagine biosynthesis I                      | 80.00%                           | 1.00E-02 |

|                                                              |        |          |
|--------------------------------------------------------------|--------|----------|
| citrulline biosynthesis                                      | 77.80% | 4.20E-03 |
| proline biosynthesis II (from arginine)                      | 75.00% | 5.50E-03 |
| methylglyoxal degradation VI                                 | 75.00% | 2.60E-02 |
| NAD biosynthesis from 2-amino-3-carboxymuconate semialdehyde | 75.00% | 2.60E-02 |
| adenosine nucleotides de novo biosynthesis                   | 75.00% | 2.60E-02 |
| uracil degradation II (reductive)                            | 75.00% | 2.60E-02 |
| arginine degradation VI (arginase 2 pathway)                 | 71.40% | 8.70E-03 |
| aerobic respiration -- electron donors reaction list         | 71.40% | 3.10E-02 |
| inosine-5-phosphate biosynthesis II                          | 71.40% | 3.10E-02 |
| arginine degradation I (arginase pathway)                    | 66.70% | 1.80E-02 |
| glutamate degradation VII                                    | 66.70% | 2.20E-02 |
| glutamate degradation IV                                     | 62.50% | 1.40E-02 |
| glutamine degradation II                                     | 60.00% | 5.00E-02 |
| glutamate degradation III (via 4-aminobutyrate)              | 60.00% | 5.00E-02 |
| L-cysteine degradation III                                   | 60.00% | 5.00E-02 |
| aspartate degradation II                                     | 60.00% | 5.00E-02 |
| 4-aminobutyrate degradation I                                | 60.00% | 5.00E-02 |
| 4-aminobutyrate degradation IV                               | 60.00% | 5.00E-02 |
| serine biosynthesis                                          | 60.00% | 5.00E-02 |
| proline biosynthesis II                                      | 60.00% | 5.00E-02 |
| 5-aminoimidazole ribonucleotide biosynthesis I               | 57.10% | 3.10E-02 |
| uridine-5-phosphate biosynthesis                             | 57.10% | 3.10E-02 |
| tRNA charging pathway                                        | 52.40% | 7.90E-03 |

**Appendix Table S3** Systems levels analysis of pathways affected by Hyperoxia vs

Hyperoxia+Roxadustat of retina metabolome in positive ionization mode of LC-MS/MS data.

| Pathway                                         | Overlapping putative metabolites | p-values |
|-------------------------------------------------|----------------------------------|----------|
| proline degradation II                          | 100.00%                          | 2.10E-03 |
| methylglyoxal degradation II                    | 100.00%                          | 9.30E-03 |
| 5-aminoimidazole ribonucleotide biosynthesis II | 80.00%                           | 1.60E-03 |
| proline biosynthesis II                         | 80.00%                           | 1.60E-03 |
| arginine degradation VI (arginase 2 pathway)    | 75.00%                           | 1.10E-03 |
| proline biosynthesis II (from arginine)         | 75.00%                           | 1.10E-03 |
| alanine degradation III                         | 75.00%                           | 3.80E-03 |



|                                                                  |        |          |
|------------------------------------------------------------------|--------|----------|
| proline degradation III                                          | 75.00% | 3.80E-03 |
| alanine biosynthesis II                                          | 75.00% | 3.80E-03 |
| uracil degradation II (reductive)                                | 75.00% | 3.80E-03 |
| citrulline biosynthesis                                          | 70.00% | 1.00E-03 |
| glutamate degradation IV                                         | 66.70% | 1.20E-03 |
| tyrosine degradation I                                           | 66.70% | 2.30E-03 |
| 4-hydroxyproline degradation I                                   | 66.70% | 2.30E-03 |
| 4-aminobutyrate degradation IV                                   | 66.70% | 2.30E-03 |
| glycine degradation (creatine biosynthesis)                      | 66.70% | 2.30E-03 |
| 5-aminoimidazole ribonucleotide biosynthesis I                   | 66.70% | 2.30E-03 |
| glutamine degradation I                                          | 66.70% | 2.00E-02 |
| methylglyoxal degradation I                                      | 66.70% | 2.00E-02 |
| glycine biosynthesis III                                         | 66.70% | 2.00E-02 |
| glutamine biosynthesis II                                        | 66.70% | 2.00E-02 |
| L-glutamine biosynthesis II (tRNA-dependent)                     | 66.70% | 2.00E-02 |
| arginine degradation I (arginase pathway)                        | 62.50% | 1.70E-03 |
| tryptophan degradation I (via anthranilate)                      | 60.00% | 6.70E-03 |
| UDP-N-acetyl-D-glucosamine biosynthesis II                       | 60.00% | 6.70E-03 |
| asparagine biosynthesis I                                        | 60.00% | 6.70E-03 |
| cysteine biosynthesis II                                         | 60.00% | 6.70E-03 |
| cysteine biosynthesis/homocysteine degradation                   | 60.00% | 6.70E-03 |
| glycine betaine degradation                                      | 57.10% | 3.50E-03 |
| catecholamine biosynthesis                                       | 57.10% | 3.50E-03 |
| tRNA charging pathway                                            | 52.40% | 1.00E-03 |
| lysine degradation II                                            | 50.00% | 3.20E-03 |
| arginine biosynthesis IV                                         | 50.00% | 3.20E-03 |
| creatine biosynthesis                                            | 50.00% | 5.40E-03 |
| $\beta$ -alanine degradation I                                   | 50.00% | 1.20E-02 |
| glutamate degradation III (via 4-aminobutyrate)                  | 50.00% | 1.20E-02 |
| tryptophan degradation to 2-amino-3-carboxymuconate semialdehyde | 50.00% | 1.20E-02 |
| 4-aminobutyrate degradation I                                    | 50.00% | 1.20E-02 |
| NAD biosynthesis from 2-amino-3-carboxymuconate semialdehyde     | 50.00% | 1.20E-02 |
| Uridine-5'-phosphate biosynthesis                                | 50.00% | 1.20E-02 |
| L-cysteine degradation III                                       | 50.00% | 3.80E-02 |
| methylglyoxal degradation VI                                     | 50.00% | 3.80E-02 |
| ketogenesis                                                      | 50.00% | 3.80E-02 |
| ketogenesis                                                      | 50.00% | 3.80E-02 |
| tetrapyrrole biosynthesis II                                     | 50.00% | 3.80E-02 |

|                                            |        |          |
|--------------------------------------------|--------|----------|
| folate polyglutamylation                   | 50.00% | 3.80E-02 |
| pyrimidine ribonucleotides interconversion | 50.00% | 3.80E-02 |
| histidine degradation III                  | 42.90% | 1.90E-02 |
| putrescine degradation III                 | 42.90% | 1.90E-02 |
| urea cycle                                 | 37.50% | 3.00E-02 |
| dopamine degradation                       | 37.50% | 3.00E-02 |
| pyridine nucleotide cycling                | 37.50% | 3.00E-02 |
| valine degradation I                       | 36.40% | 1.90E-02 |
| phenylalanine degradation III              | 33.30% | 4.50E-02 |

**Appendix Table S4** Systems levels analysis of pathways affected by Hyperoxia vs

Hyperoxia+Roxadustat of retina metabolome in negative ionization mode of LC-MS/MS data.

| Pathway                                                  | Overlapping putative metabolites | p-values |
|----------------------------------------------------------|----------------------------------|----------|
| thymine degradation                                      | 100.00%                          | 5.50E-03 |
| mevalonate pathway                                       | 100.00%                          | 5.50E-03 |
| methionine salvage                                       | 100.00%                          | 4.00E-02 |
| lactose degradation III                                  | 100.00%                          | 4.00E-02 |
| sucrose degradation                                      | 87.50%                           | 1.20E-03 |
| pyrimidine deoxyribonucleosides degradation              | 83.30%                           | 2.00E-03 |
| guanine and guanosine salvage                            | 75.00%                           | 1.40E-02 |
| trehalose degradation                                    | 75.00%                           | 1.40E-02 |
| purine ribonucleosides degradation to ribose-1-phosphate | 66.70%                           | 2.50E-03 |
| adenine and adenosine salvage III                        | 66.70%                           | 7.90E-03 |
| purine deoxyribonucleosides degradation                  | 66.70%                           | 7.90E-03 |

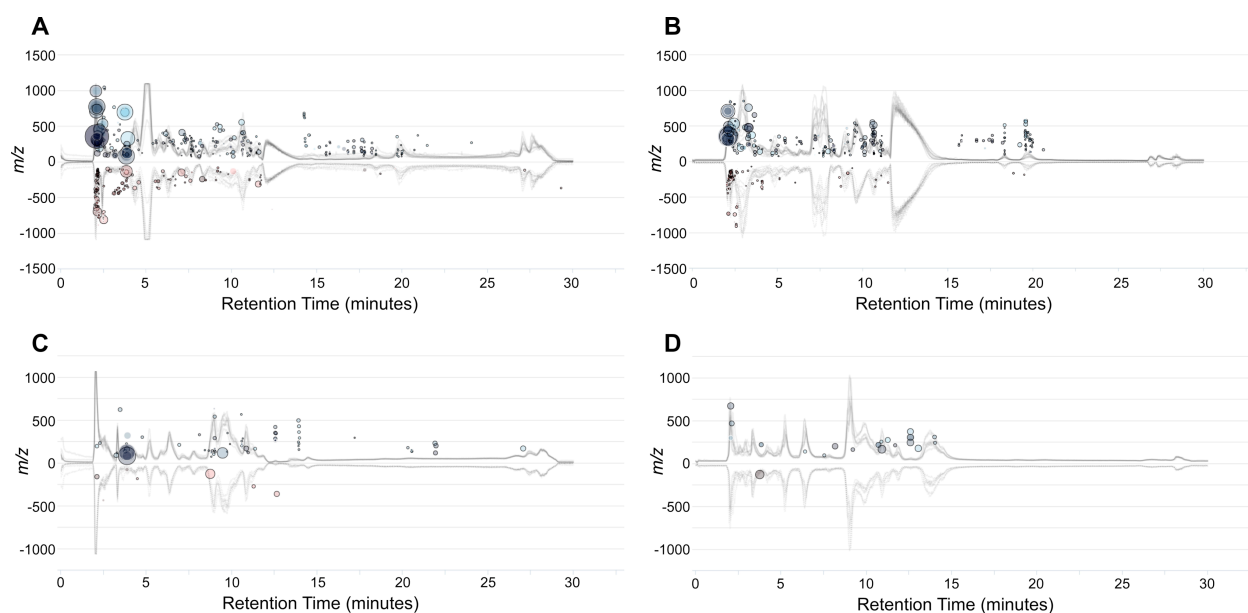

**Appendix Figure S1** Metabolite cloud plots depicting metabolite features up and down regulated by the HIF PHi Roxadustat (A-D). Untargeted dd-MS2 data were analyzed using XCMS Online tool and the cloud plots of differentially up or down regulated metabolites were generated. In the cloud plots, different shades of blue represent up-regulated metabolites and different shades of red are the down-regulated metabolites, control hyperoxic (n=6, each group) vs. Roxadustat treated hyperoxic (n=6, each group) C57BL/6 mice samples. Each bubble represent a metabolite feature, where bigger size of the bubble represents higher fold-change and darker color represent lower p-value. Gray-scaled plot in the background represent total-ion chromatograms for each sample. Only metabolite features with p-value  $\leq 0.01$  and fold change  $\geq 1.5$  are represented in all four cloud plots. (A) Positive mode plasma samples contained 613 metabolite features. (B) Negative mode plasma samples contained 398 metabolite features. (C) Positive mode plasma samples contained 82 metabolite features. (D) Negative mode retina samples contained 23 metabolite features different between treatment and control groups.

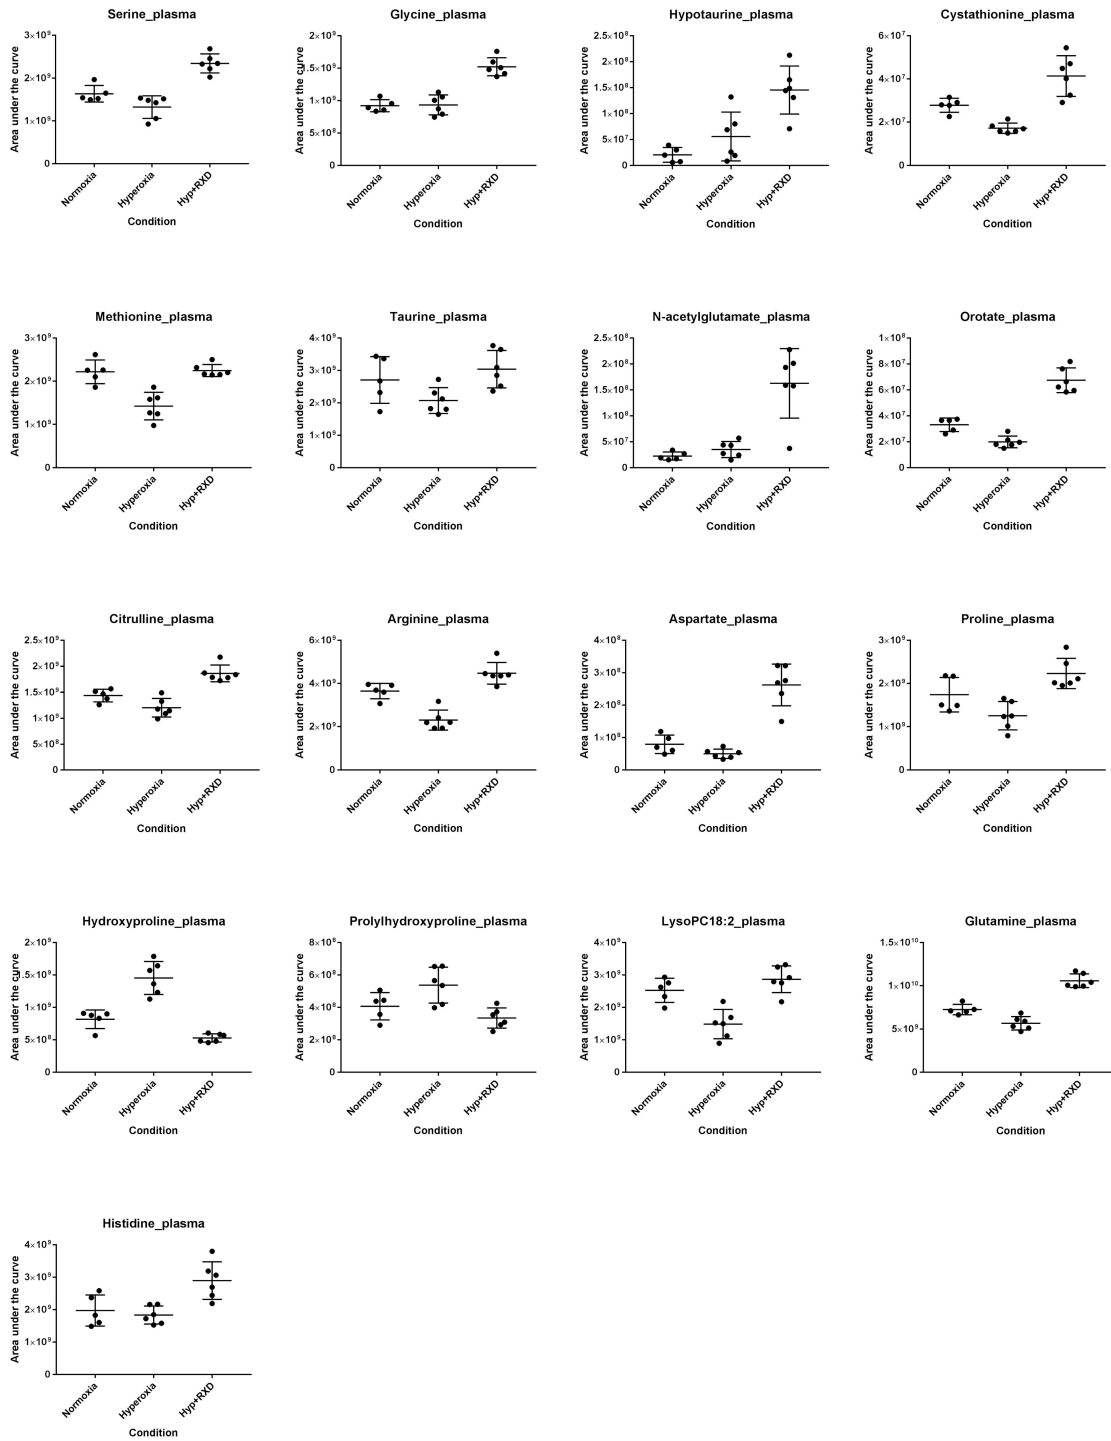

**Appendix Figure S2** Box-plots of annotated metabolites from plasma samples demonstrates upregulation of serine 1C and urea pathways.

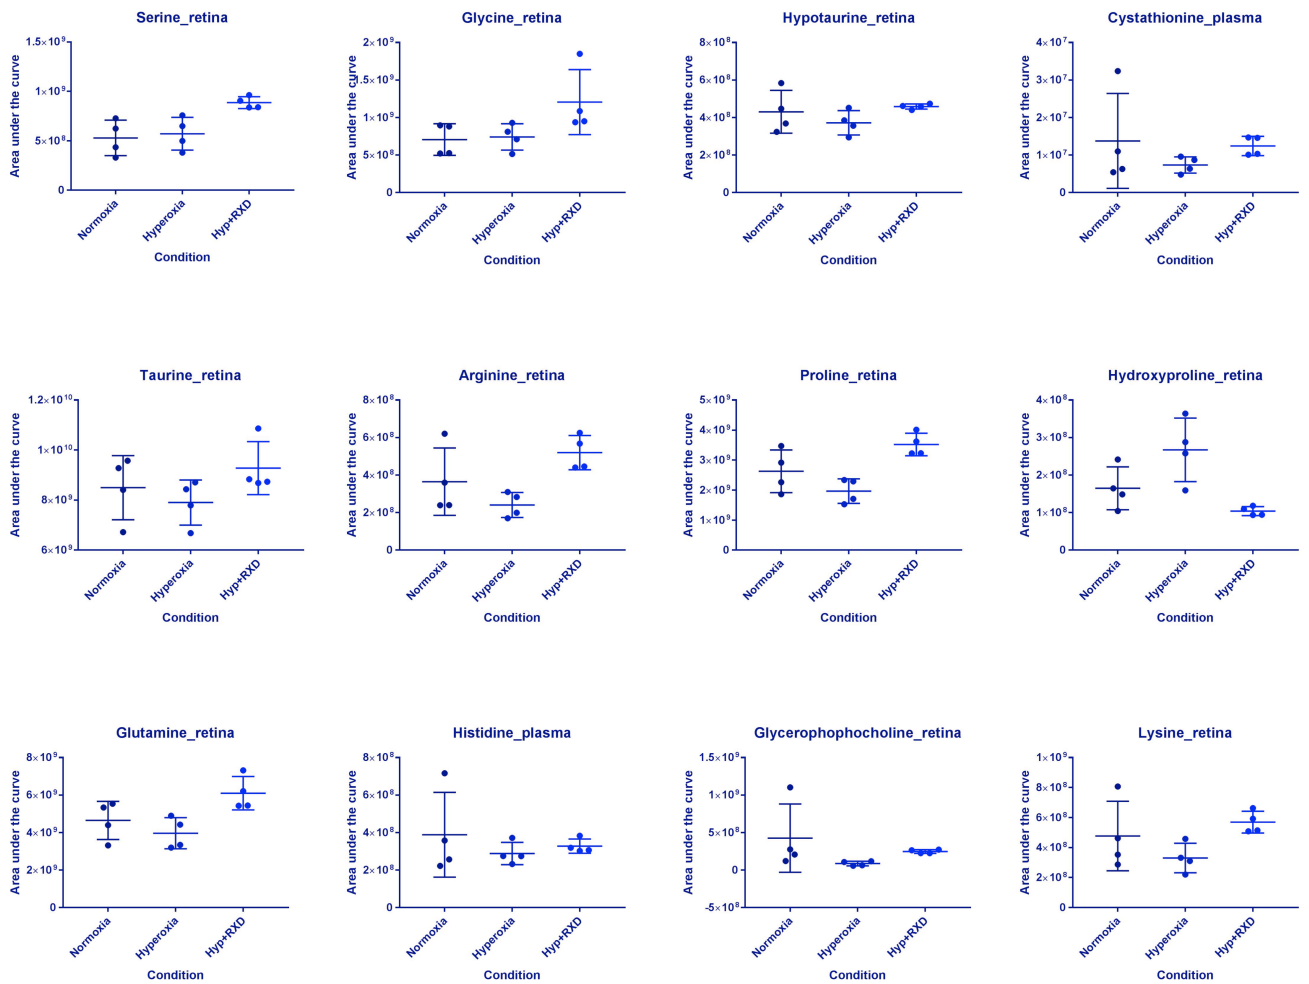

**Appendix Figure S3** Box-plots of annotated metabolites from retina samples demonstrates upregulation of serine 1C and urea pathways.

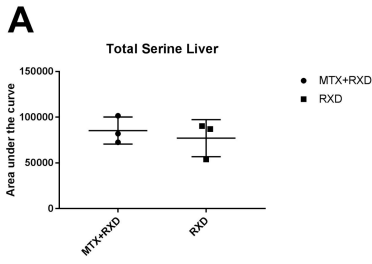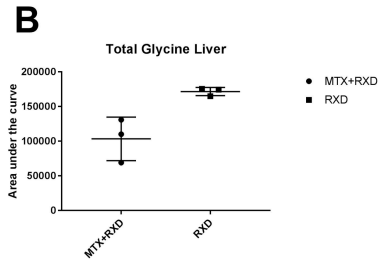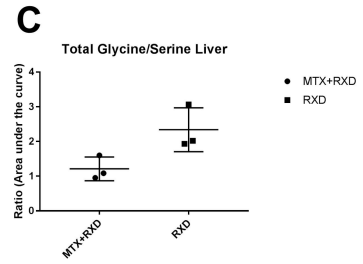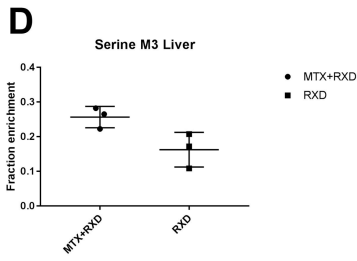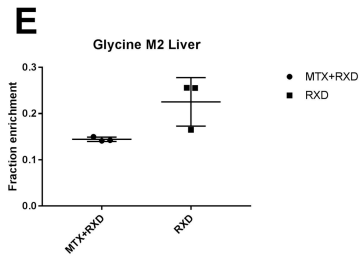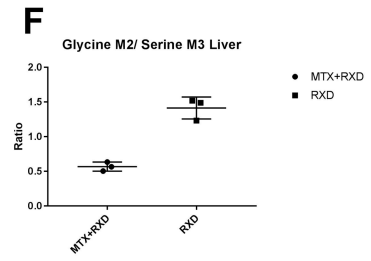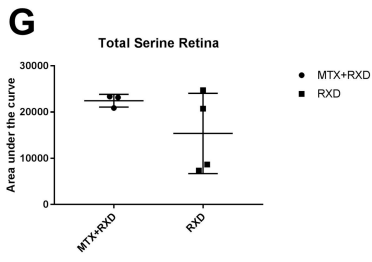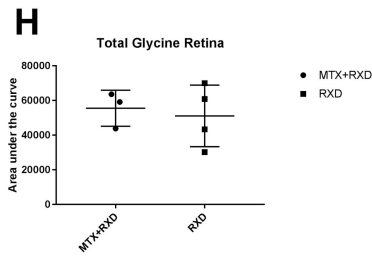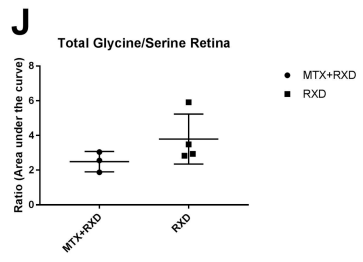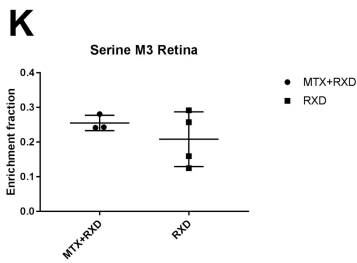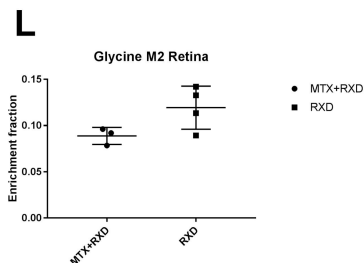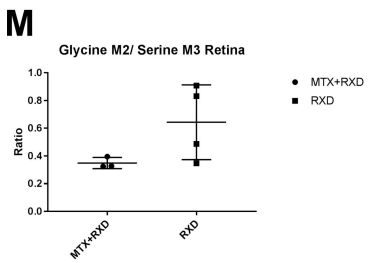

## Appendix Figure S4

Serine to Glycine conversion was decreased in the MTX injected mice. (A) total serine (B) total glycine and (C) total glycine/serine content in mice livers injected with MTX+RXD vs. RXD.

Fraction enrichment of (D) M3 serine, (E) M2 glycine and (F) glycine M2/ serine M3 in the mice livers, injected with MTX+RXD vs. RXD. (G) total serine (H) total glycine and (I) total glycine/serine content in mice retina, injected with MTX+RXD vs. RXD. Fraction enrichment of (J) M3 serine, (K) M2 glycine and (L) glycine M2/ serine M3 in the mice livers injected with MTX+RXD vs. RXD MTX, Methotrexate; RXD, Roxadustat.

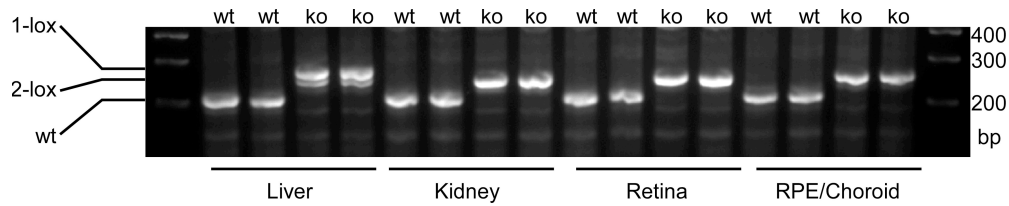

**Appendix Figure S5.** Liver-specific Cre-induced recombination of HIF1A gene in LHKO mouse strain. Efficient and tissue-specific recombination was confirmed by PCR analysis of genomic DNA extracted from liver, kidney, retina and RPE/choroid of the wt and LHKO mouse. Primers (two forward and one reverse) were designed to amplify the conditional allele (2-lox), recombined allele (1-lox), and WT allele as previously described [Rankin et al, JCI 2007, PMID 17404621]. 1-lox and 2-lox designate the recombined (270-bp) and non-recombined (260-bp) alleles, respectively, and WT allele (240-bp). Following PCR procedure and agarose gel separation of amplicons as described elsewhere [Hoppe et al, AJP 2014, PMID 24731446], only the LHKO liver samples demonstrated the presence of recombined allele (1-lox).



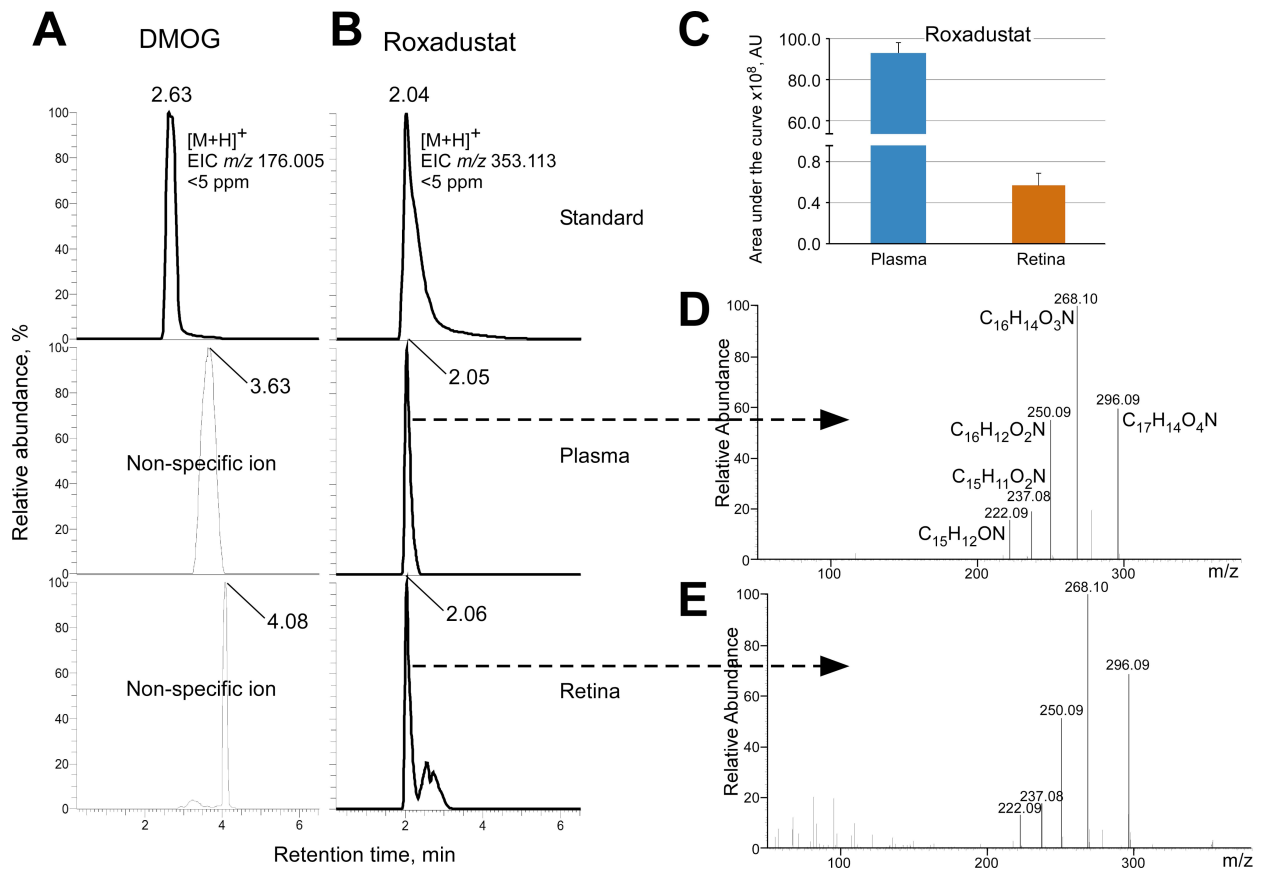

**Appendix Figure S6** LCMS1/MS2 of dimethyloxalyglycine (DMOG) versus roxadustat (RXD) demonstrates that DMOG does not enter plasma but RXD does. This provides liver specific action to DMOG when injected intraperitoneally.
